# Supplementary material for: DNA methylation epigenotype and clinical features of NRAS‐mutation(+) colorectal cancer
Source: PubMed Central journal article supplement (PMC5430106; doi:10.1002/cam4.1061), 2017-04-04
Supplement: CAM4-6-1023-s001.pdf [file CAM4-6-1023-s001.pdf]

**Supplementary information**

**DNA methylation epigenotype and clinical features of NRAS-mutation(+) colorectal cancer**

Kiyoko Takane MD, PhD, Kiwamu Akagi MD, PhD, Masaki Fukuyo PhD, Koichi Yagi MD, PhD, Tadatoshi Takayama MD, PhD, Atsushi Kaneda MD, PhD

**Supplementary Tables:**

**Supplementary Table S1.**

**Supplementary Table S2.**

**Supplementary Figures:**

**Supplementary Figure S1.**

**Supplementary Figure S2.**

**Supplementary Figure S3.**

Supplementary Table S1. Methylation marker genes and primer sequences for pyrosequencing

| Gene            | PCR Primers (Forward/Reverse)            | Sequencing primers        |
|-----------------|------------------------------------------|---------------------------|
| <b>Group-1</b>  |                                          |                           |
| <i>SPON1</i>    | <b>F</b> AGGAGGTTGTTGTTTTAATTTTAGTTATA   | AGTTATATTTAGGATTTTTTGGAG  |
|                 | <b>R*</b> AATTATTTCTCAAACCTTCCCTCCTCTA   |                           |
| <i>TIMP3</i>    | <b>F</b> AGAGATATTTAGTGGTTTAGGTG         | GGTGGGAGTGGGGTTA          |
|                 | <b>R*</b> AAACCCTCCTACCCCTTCT            |                           |
| <i>CACNA1G</i>  | <b>F</b> TGTTTTGGTTAAGTAGAAGAAAAT        | TGGTTAAGTAGAAGAAAATTAT    |
|                 | <b>R*</b> ACCCAAATCAACAAAAAAAACCC        |                           |
| <i>MLH1</i>     | <b>F</b> ATGTGGATGAAGTTTAAAAGAAGTAAGAT   | ATGGAAGTAGAAGAGGTTTTAGTTT |
|                 | <b>R*</b> AAAACTCCACCACCAATA             |                           |
| <i>MINT17</i>   | <b>F*</b> AAGTGGGAGAAGAGGAAGAGAAAAATA    | TATCCCTCCCATCT            |
|                 | <b>R</b> CTATCCTCCCAAACCTTCT             |                           |
| <i>p16INKA</i>  | <b>F*</b> GGTGGGTAGAGGGTTTGTA            | GGGAGTAGGGGATGG           |
|                 | <b>R</b> CCAATTCCCCTACAACTT              |                           |
| <b>Group-2</b>  |                                          |                           |
| <i>ADAMTS1</i>  | <b>F</b> GTTTTTGGGGTTTTAATGTAG           | TTAATGTAGAGAGTTGTGT       |
|                 | <b>R*</b> TTCCCACATCCCTACCCAACCTTAC      |                           |
| <i>BNIP3</i>    | <b>F</b> AGAAGTAGATTTATTTTTAGGTGGAATT    | ATTTTTAGGTGGAATTTTAGT     |
|                 | <b>R*</b> AAAAAACCCCATCTCCAACCT          |                           |
| <i>EDIL3</i>    | <b>F</b> GGGATTTTTAGTTTATTTTTATTAGTTG    | TTAGTTTATTTTTATTAGTTGTT   |
|                 | <b>R*</b> ACTCAACCTCCATATCCCCAATT        |                           |
| <i>EFEMP1</i>   | <b>F*</b> TTGGGAAGTTGAGTAGTTTTAGGG       | AAATCCCCTTTCTTAACA        |
|                 | <b>R</b> ACCCCACAAAAAATAAAATCCCCTTCTT    |                           |
| <i>ELMO1</i>    | <b>F</b> GGAGGAAGGAAGAGGAAGTGA           | GAGGAAGTGAGAGTAG          |
|                 | <b>R*</b> CCAACACACCCACTTACTCTAAAT       |                           |
| <i>PPP1R3C</i>  | <b>F</b> GTGTTTGGGAGTAGATAAG             | TTTTTAGGAGTAGGGTTTTAGTTT  |
|                 | <b>R*</b> CACAACCTCAAACCTTACC            |                           |
| <i>PPP1R14A</i> | <b>F</b> GGGGGTTTGGGATAGATAT             | GGGATTAGGTTTGTGTTG        |
|                 | <b>R*</b> CTCCCCACCAACAACCC              |                           |
| <i>RASSF2</i>   | <b>F</b> AGGGTTGTTAGGTTTTTTTTAGT         | GTTAGGTTTTTTTTAGTTTTGTA   |
|                 | <b>R*</b> CCCATCCCCCAAATCTCTAAAACCTT     |                           |
| <i>STOX2</i>    | <b>F</b> AGGTTGGGGTAGTTGTTAAG            | GGGTAGTTGTTAAGGTTT        |
|                 | <b>R*</b> TCCCATCAAACCTTCTCATTTTCA       |                           |
| <i>TMEFF2</i>   | <b>F</b> ATTTAGGGATTGGGTTTAGT            | AGGGTAGTTAGTTGAGAAGT      |
|                 | <b>R*</b> CCCTCCTTATAACAACAACCT          |                           |
| <i>UCHL1</i>    | <b>F*</b> GGTAGGGTTTTTAAATTTTGTAGTTTTATT | CCACCAAATTATCTCACC        |
|                 | <b>R</b> CCACAACCACCAAATTATCT            |                           |
| <i>ZNF447</i>   | <b>F</b> GGGGTAGTTGAGTAGTAGGTGG          | GGTAGGTTTAGGGGATGTAG      |
|                 | <b>R*</b> CCTCACCCTCTACCCTATTTAAATC      |                           |
| <i>NEUROG1</i>  | <b>F</b> AGTTTGGGGTTGTTATTTTGTGTTA       | GTTGTTATTTTGTGTTAGTTG     |
|                 | <b>R*</b> AAAAAACCAAACCAAATTCTCC         |                           |

\* Printers with 5'-biotin tag.

Supplementary Table S2. Comparison of clinicopathological features of all CRC cases

| Clinical features                 | All cases | <i>BRAF</i> | <i>KRAS</i> | <i>NRAS</i> | No-mut   | <i>P</i> -value<br>( <i>K</i> vs <i>N</i> vs <i>No</i> ) | <i>P</i> -value<br>( <i>K</i> vs <i>N</i> ) |
|-----------------------------------|-----------|-------------|-------------|-------------|----------|----------------------------------------------------------|---------------------------------------------|
| # of sample                       | 205       | 13          | 59          | 56          | 72       |                                                          |                                             |
| <i>Gender</i>                     |           |             |             |             |          |                                                          |                                             |
| Male                              | 115       | 9           | 33          | 25          | 48       | 0.2                                                      | 0.6                                         |
| Female                            | 84        | 4           | 26          | 25          | 24       |                                                          |                                             |
| Unkown                            | 6         | 0           | 0           | 6           | 0        |                                                          |                                             |
| <i>Age (y.o.)</i>                 |           |             |             |             |          |                                                          |                                             |
| Mean±SD                           | 63.8±9.4  | 71.0±8.5    | 61.7±9.4    | 66.7±9.1    | 62.0±9.1 | *0.005                                                   | *0.01                                       |
| <i>Tumor location</i>             |           |             |             |             |          |                                                          |                                             |
| Proximal                          | 61        | 13          | 23          | 6           | 17       | *2×10 <sup>-5</sup>                                      | *0.002                                      |
| Distal                            | 137       | 0           | 36          | 43          | 55       |                                                          |                                             |
| Unkown                            | 7         | 0           | 0           | 7           | 0        |                                                          |                                             |
| <i>Mucinous component</i>         |           |             |             |             |          |                                                          |                                             |
| (+)                               | 31        | 8           | 14          | 3           | 5        | *0.004                                                   | *0.02                                       |
| (-)                               | 167       | 5           | 45          | 46          | 67       |                                                          |                                             |
| Unkown                            | 7         | 0           | 0           | 7           | 0        |                                                          |                                             |
| <i>AJCC Stage</i>                 |           |             |             |             |          |                                                          |                                             |
| I                                 | 15        | 3           | 0           | 11          | 0        | *5×10 <sup>-6</sup>                                      | *0.001                                      |
| II                                | 54        | 5           | 17          | 16          | 16       |                                                          |                                             |
| III                               | 64        | 3           | 21          | 11          | 26       |                                                          |                                             |
| IV                                | 66        | 2           | 21          | 12          | 30       |                                                          |                                             |
| Unkown                            | 6         | 0           | 0           | 6           | 0        |                                                          |                                             |
| <i>Lymph node metastasis</i>      |           |             |             |             |          |                                                          |                                             |
| (+)                               | 108       | 5           | 39          | 17          | 43       | *0.005                                                   | *0.003                                      |
| (-)                               | 87        | 8           | 20          | 30          | 28       |                                                          |                                             |
| Unkown                            | 10        | 0           | 0           | 9           | 1        |                                                          |                                             |
| <i>Lymph vessel invasion</i>      |           |             |             |             |          |                                                          |                                             |
| (+)                               | 135       | 11          | 48          | 19          | 53       | *5×10 <sup>-6</sup>                                      | *8×10 <sup>-6</sup>                         |
| (-)                               | 63        | 2           | 11          | 30          | 19       |                                                          |                                             |
| Unkown                            | 7         | 0           | 0           | 7           | 0        |                                                          |                                             |
| <i>Venous invasion</i>            |           |             |             |             |          |                                                          |                                             |
| (+)                               | 157       | 9           | 48          | 33          | 62       | *0.04                                                    | 0.1                                         |
| (-)                               | 41        | 4           | 11          | 16          | 10       |                                                          |                                             |
| Unkown                            | 7         | 0           | 0           | 7           | 0        |                                                          |                                             |
| <i>Microsatellite instability</i> |           |             |             |             |          |                                                          |                                             |
| MSI-H                             | 17        | 11          | 3           | 0           | 3        | 0.3                                                      | 0.3                                         |
| MSS                               | 180       | 2           | 56          | 48          | 69       |                                                          |                                             |
| Unkown                            | 8         | 0           | 0           | 8           | 0        |                                                          |                                             |
| <i>Methylation epigenotype</i>    |           |             |             |             |          |                                                          |                                             |
| HME                               | 13        | 9           | 2           | 0           | 2        | *3×10 <sup>-4</sup>                                      | *1×10 <sup>-4</sup>                         |
| IME                               | 89        | 4           | 40          | 18          | 27       |                                                          |                                             |
| LME                               | 98        | 0           | 17          | 38          | 43       |                                                          |                                             |

*No-mut*: no mutation. *B* vs *K* vs *N*: *BRAF* vs *KRAS* vs *NRAS*. *K* vs *N*: *KRAS* vs *NRAS*.

*MSI-H*: microsatellite instability high. *MSS*: microsatellite stable. \**P* < 0.05

Fig. S1

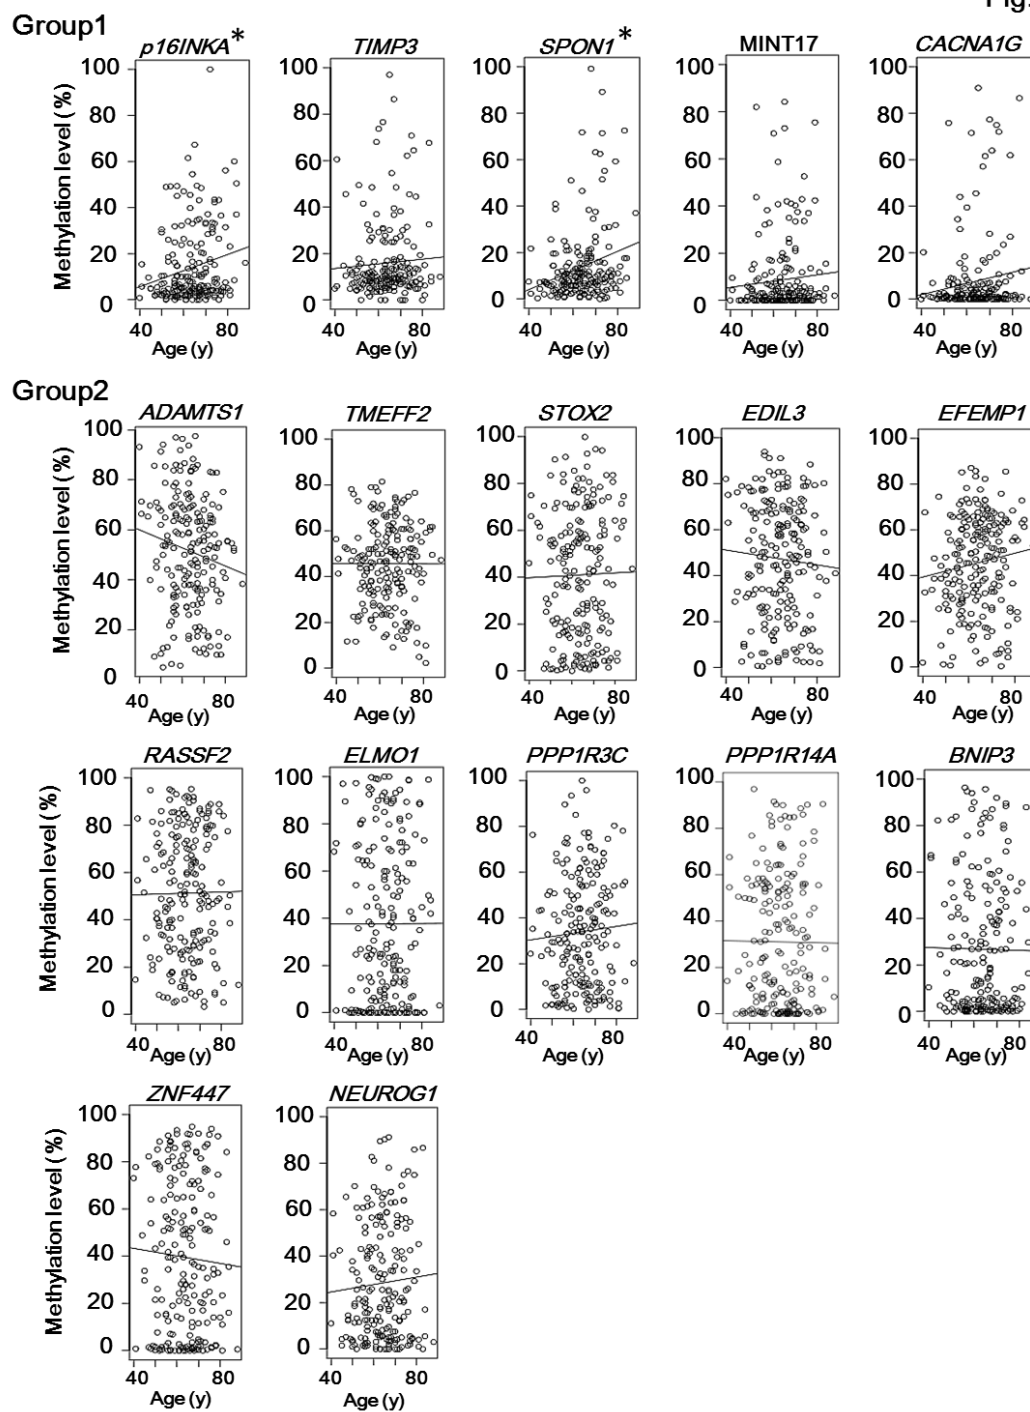

**Supplementary Figure S1.** Comparison between methylation levels and age using linear single regression model. Three of the six Group-1 markers showed a significant correlation between higher methylation levels and age ( $*P < 0.008$ ), while none of Group-2 markers did. Since six Group-1 markers were evaluated,  $P$ -values  $< 0.008$  (i.e.,  $0.05/6$ ) were considered significant.

Fig. S2

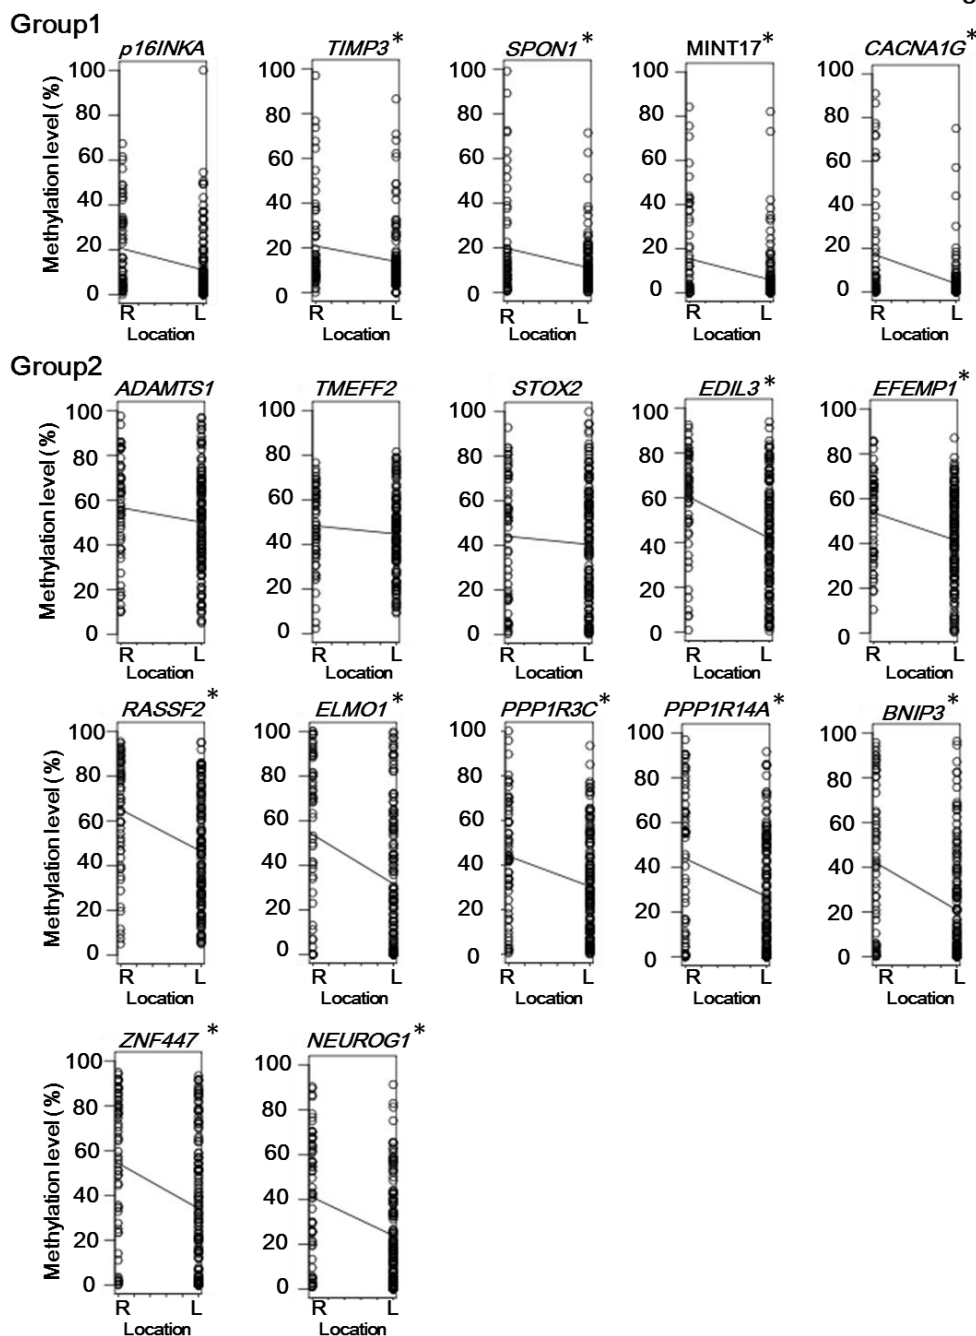

**Supplementary Figure S2.** Comparison between methylation levels and tumor location using a linear single regression model. While five of the Group-1 markers showed a significant correlation between higher methylation level and proximal location ( $*P < 0.008$ ), 10 of 13 Group-2 markers showed significant correlation between higher methylation level and proximal location ( $*P < 0.004$ ). Since six Group-1 markers and 13 Group-2 markers were evaluated,  $P$ -values  $< 0.008$  (i.e.,  $0.05/6$ ) and  $< 0.004$  (i.e.,  $0.05/13$ ), respectively, were considered significant.

Fig. S3

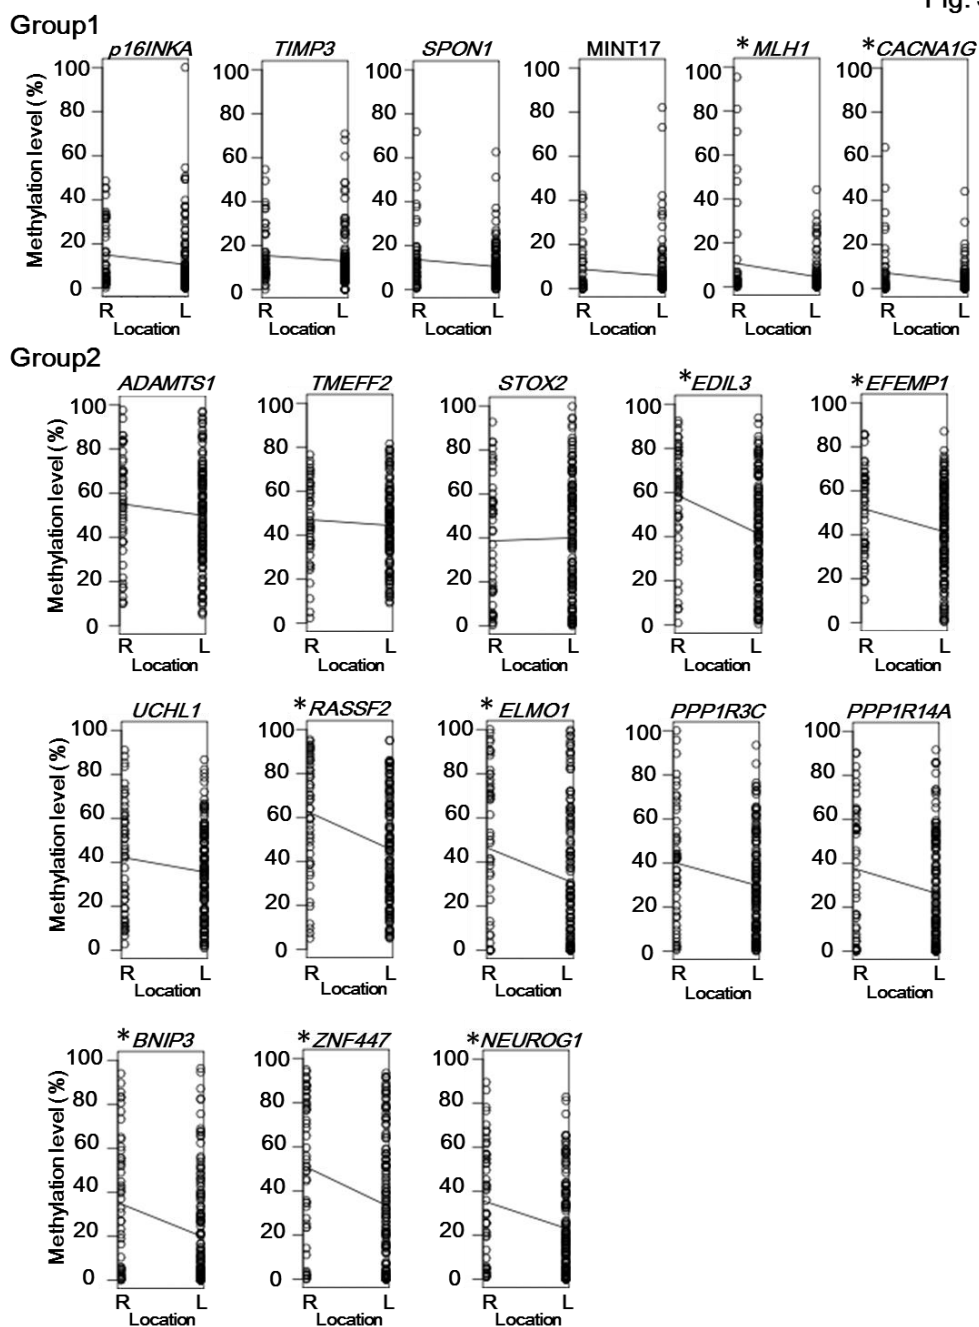

**Supplementary Figure S3.** Comparison between methylation levels and tumor location using a linear single regression model, excluding HME CRCs. While two of the Group-1 markers showed a significant correlation between higher methylation level and proximal location ( $*P < 0.008$ ), 7 of 13 Group-2 markers showed a significant correlation between higher methylation level and proximal location ( $*P < 0.004$ ). Since six Group-1 markers and 13 Group-2 markers were evaluated,  $P$ -values  $< 0.008$  (i.e.,  $0.05/6$ ) and  $< 0.004$  (i.e.,  $0.05/13$ ), respectively, were considered significant.
